# Supplementary material
Source: PubMed Central journal article supplement (PMC3408629)
Supplement: NIHMS346423-supplement-02.pdf [file NIHMS346423-supplement-02.pdf]

| Progeny #             | 1   | 2 | 3   | 4 | 5 | 6 | 7 | 8 | 9 | 10 | 11 | 12  | 13 | 14  | 15  | 16 | 17 | 18 | 19 | 20 |   |
|-----------------------|-----|---|-----|---|---|---|---|---|---|----|----|-----|----|-----|-----|----|----|----|----|----|---|
| <i>Chr2: YBR219C</i>  | +   | - |     | + | + | - | - |   |   |    |    |     |    |     |     |    |    |    |    |    |   |
| <i>Chr3: KIN82</i>    | +   |   |     | - | - | - | + |   | + |    |    |     |    |     |     |    |    |    |    |    |   |
| <i>Chr3: KRR1</i>     | +   | + | +/- | + | + | + | + | + | + | +  | +  | +/- |    | +/- | +/- |    | +  | +  |    |    |   |
| <i>Chr4: KRS1</i>     | +   | + |     | + | + | + | + | + | + | +  | +  |     | +  |     |     | +  |    |    |    |    |   |
| <i>Chr4: CDC7</i>     | +   | + | +   | + | + | - | + | + | + | +  | +  | +/- | -  | +/- | +/- | +  |    |    |    |    |   |
| <i>Chr5: RAD3</i>     | +   | + | +/- | + | + | + | + | + | + | +  | +  | +/- | +  | +/- | +/- |    | +  |    |    |    |   |
| <i>Chr6: PHO4</i>     | +   |   |     | + | - | - | + | + |   |    |    |     |    |     |     |    |    |    |    |    |   |
| <i>Chr6: EPLI</i>     | -   | - | +/- | - | - | + | - | - | - | +  | -  | +/- | +  | +/- | +/- | -  | -  | +  | +  | -  | - |
| <i>Chr9: AIM19</i>    | +   | + |     | - | - |   | - | - |   |    |    |     |    |     |     |    |    |    |    |    |   |
| <i>Chr10: YJRO12C</i> | -   | + | +   | - | - | + | - |   | - |    |    |     |    |     |     |    |    |    |    |    |   |
| <i>Chr12: FMP27</i>   | -   | + |     | - | + | - | - |   |   |    |    |     |    |     |     |    |    |    |    |    |   |
| <i>Chr12: MDN1</i>    | +   | + | +/- | + | + | + | + | + | + | +  | +  | +/- | +  | +/- | +/- | +  | +  | +  | +  | +  | + |
| <i>Chr13: EVR41</i>   | -   | - | +/- | - | + | - | - | + | + | +  | -  | +/- | -  | +/- | +/- |    |    |    |    |    |   |
| <i>Chr13: BUL1</i>    | -   | + |     | + | + | + | - |   |   |    |    |     |    |     |     |    |    |    |    |    |   |
| <i>Chr14: TOM70</i>   | -   | + |     | + | + | - | + |   |   |    |    |     |    |     |     |    |    |    |    |    |   |
| <i>Chr14: AVT4</i>    | -   | + |     | + | - | + | + |   |   |    |    |     |    |     |     |    |    |    |    |    |   |
| <i>Chr14: BIO3</i>    | +   | - |     |   | - | - | - |   | + |    |    |     |    |     |     |    |    |    |    |    |   |
| <i>Chr16: FMP40</i>   | -   | + |     | + | - | + | + |   |   |    |    |     |    |     |     |    |    |    |    |    |   |
| <i>Chr16: RAD1</i>    | -   | + |     | - | - | - | - | - | - | -  | +  |     | -  |     |     |    |    |    |    |    |   |
| <i>Chr16: REC8</i>    |     |   | +/- | - | - | - | - | - | - | -  |    | +/- | -  | +/- | +/- | -  | +  | -  |    |    |   |
| <i>Chr16: 639362</i>  |     | - |     | - | - | - | - | - | - | -  |    |     | -  |     |     | -  | +  |    |    |    |   |
| <i>Chr16: RRP15</i>   | +/- | + |     | + | + | + | + | + | + | +  | +  |     | +  |     |     | +  |    |    |    | +  |   |
